# Supplementary material for: The effect of ferroptosis - related proteins and histone deacetylases1 on neoadjuvant chemotherapy in breast cancer
Source: PubMed Central journal article supplement — Medicine (Baltimore). 2023 Jul 28;102(30):e34444. doi: 10.1097/MD.0000000000034444 (PMC10378733; doi:10.1097/md.0000000000034444), 2023-07-28
Supplement: medi-102-e34444-s001.pdf [file medi-102-e34444-s001.pdf]

### **Neoadjuvant chemotherapy regimens**

Patients received an anthracycline- based and paclitaxel-based 8-cycle regimen of chemotherapy. Patients who were human epidermal growth factor receptor 2 (Her-2) positive received anti-Her-2 targeted therapy. Anthracyclines included adriamycin (60 mg/m<sup>2</sup> every 3 weeks for 4 cycles) and epirubicin (90 mg/m<sup>2</sup> every 2 weeks for 4 cycles). Paclitaxel includes doxorubicin (90 mg/m<sup>2</sup> every 3 weeks for 4 cycles) and abraxane (125 mg/m<sup>2</sup>, d1, d8, d15 every 3 weeks for the next 4 cycles). For Her-2 positive patients, trastuzumab was accompanied by paclitaxel at a loading dose of 8 mg/kg, followed by a maintenance dose of 6 mg/kg.
