# Supplementary material for: The effect of ferroptosis - related proteins and histone deacetylases1 on neoadjuvant chemotherapy in breast cancer
Source: PubMed Central journal article supplement — Medicine (Baltimore). 2023 Jul 28;102(30):e34444. doi: 10.1097/MD.0000000000034444 (PMC10378733; doi:10.1097/md.0000000000034444), 2023-07-28
Supplement: medi-102-e34444-s002.pdf [file medi-102-e34444-s002.pdf]

**Table S1 Relationships of expression with characteristics before neoadjuvant chemotherapy.**

| Characteristics    | Total<br>(n = 82) | Expression of HDAC1      |                            | p     | Expression of xCT         |                              | p     |
|--------------------|-------------------|--------------------------|----------------------------|-------|---------------------------|------------------------------|-------|
|                    |                   | Low<br>(n= 42,<br>51.2%) | High<br>(n = 40,<br>48.8%) |       | Low<br>(n = 27,<br>32.9%) | High<br>(n = 55,<br>67.1, %) |       |
| Age                |                   |                          |                            | 0.522 |                           |                              | 0.680 |
| Age < 35           | 10(12.2)          | 7(16.7)                  | 3(7.5)                     |       | 4(14.8)                   | 6(10.9)                      |       |
| 35≤Age≤50          | 39(47.6)          | 19(45.2)                 | 20(50)                     |       | 11(40.7)                  | 28(50.9)                     |       |
| Age > 50           | 33(40.2)          | 16(38.1)                 | 17(42.5)                   |       | 12(44.4)                  | 21(38.2)                     |       |
| Menopausal Status  |                   |                          |                            | 0.522 |                           |                              | 0.945 |
| Premenopausal      | 46(56.1)          | 25(59.5)                 | 21(52.5)                   |       | 15(55.6)                  | 31(56.4)                     |       |
| Postmenopausal     | 36(43.9)          | 17(40.5)                 | 19(47.5)                   |       | 12(44.4)                  | 24(43.6)                     |       |
| Clinical T stage   |                   |                          |                            | 0.183 |                           |                              | 0.579 |
| T2                 | 55(67.1)          | 31(73.8)                 | 24(60)                     |       | 17(63)                    | 38(69.1)                     |       |
| T3                 | 27(32.9)          | 11(26.2)                 | 16(40)                     |       | 10(37)                    | 17(30.9)                     |       |
| Clinical N Stage   |                   |                          |                            | 0.396 |                           |                              | 0.214 |
| N0                 | 37(45.1)          | 20(47.6)                 | 17(42.5)                   |       | 13(48.1)                  | 24(43.6)                     |       |
| N1                 | 21(25.6)          | 12(28.6)                 | 9(22.5)                    |       | 4(14.8)                   | 17(30.9)                     |       |
| N2                 | 13(15.9)          | 7(16.7)                  | 6(15)                      |       | 7(25.9)                   | 6(10.9)                      |       |
| N3                 | 11(13.4)          | 3(7.1)                   | 8(20)                      |       | 3(11.1)                   | 8(14.5)                      |       |
| ER Status          |                   |                          |                            | 0.088 |                           |                              | 0.168 |
| ER negative        | 28(34.1)          | 18(42.9)                 | 10(25)                     |       | 12(44.4)                  | 16(29.1)                     |       |
| ER positive        | 54(65.9)          | 24(57.1)                 | 30(75)                     |       | 15(55.6)                  | 39(70.9)                     |       |
| PR Status          |                   |                          |                            | 1.000 |                           |                              | 1.000 |
| PR negative        | 76(92.7)          | 39(92.9)                 | 37(92.5)                   |       | 25(92.6)                  | 51(92.7)                     |       |
| PR positive        | 6(7.3)            | 3(7.1)                   | 3(7.5)                     |       | 2(7.4)                    | 4(7.3)                       |       |
| Her2 Status        |                   |                          |                            | 0.173 |                           |                              | 0.897 |
| Her-2 negative     | 60(73.2)          | 28(66.7)                 | 32(80)                     |       | 20(74.1)                  | 40(72.7)                     |       |
| Her-2 positive     | 22(26.8)          | 14(33.3)                 | 8(20)                      |       | 7(25.9)                   | 15(27.3)                     |       |
| Molecular subtypes |                   |                          |                            | 0.388 |                           |                              | 0.518 |
| Luminal A-like     | 6(7.3)            | 3(7.1)                   | 3(7.5)                     |       | 2(7.4)                    | 4(7.3)                       |       |
| Luminal B-like     | 48(58.5)          | 21(50)                   | 27(67.5)                   |       | 13(48.1)                  | 35(63.6)                     |       |
| Her-2 enriched     | 10(12.2)          | 6(14.3)                  | 4(10)                      |       | 4(14.8)                   | 6(10.9)                      |       |
| Triple negative    | 18(22.0)          | 12(28.6)                 | 6(15)                      |       | 8(29.6)                   | 10(18.2)                     |       |
| Ki67               |                   |                          |                            | 0.271 |                           |                              | 0.825 |
| Ki67<30            | 26(31.7)          | 11(26.2)                 | 15(37.5)                   |       | 9(33.3)                   | 17(30.9)                     |       |
| Ki67≥30            | 56(68.3)          | 31(73.8)                 | 25(62.5)                   |       | 18(66.7)                  | 38(69.1)                     |       |

**Table S1 (Continued) .**

| Characteristics    | Expression of GPX4 |                    |       | Expression of ABCB1 |                   |       |
|--------------------|--------------------|--------------------|-------|---------------------|-------------------|-------|
|                    | Low                | High               | p     | Low                 | High              | p     |
|                    | (n = 22,<br>26.8%) | (n = 60,<br>73.2%) |       | (n = 73,<br>89.0%)  | (n = 9,<br>11.0%) |       |
| Age                |                    |                    | 1.000 |                     |                   | 1.000 |
| Age < 35           | 3(13.6)            | 7(11.7)            |       | 9(12.3)             | 1(11.1)           |       |
| 35≤Age≤50          | 10(45.5)           | 29(48.3)           |       | 35(47.9)            | 4(44.4)           |       |
| Age > 50           | 9(40.9)            | 24(40)             |       | 29(39.7)            | 4(44.4)           |       |
| Menopausal Status  |                    |                    | 0.182 |                     |                   | 1.000 |
| Premenopausal      | 15(68.2)           | 31(51.7)           |       | 41(56.2)            | 5(55.6)           |       |
| Postmenopausal     | 7(31.8)            | 29(48.3)           |       | 32(43.8)            | 4(44.4)           |       |
| Clinical T stage   |                    |                    | 0.897 |                     |                   | 0.711 |
| T2                 | 15(68.2)           | 40(66.7)           |       | 48(65.8)            | 7(77.8)           |       |
| T3                 | 7(31.8)            | 20(33.3)           |       | 25(34.2)            | 2(22.2)           |       |
| Clinical N Stage   |                    |                    | 0.023 |                     |                   | 0.568 |
| N0                 | 9(40.9)            | 28(46.7)           |       | 31(42.5)            | 6(66.7)           |       |
| N1                 | 5(22.7)            | 16(26.7)           |       | 19(26)              | 2(22.2)           |       |
| N2                 | 1(4.5)             | 12(20)             |       | 12(16.4)            | 1(11.1)           |       |
| N3                 | 7(31.8)            | 4(6.7)             |       | 11(15.1)            | 0(0)              |       |
| ER Status          |                    |                    | 0.798 |                     |                   | 0.156 |
| ER negative        | 8(36.4)            | 20(33.3)           |       | 27(37)              | 1(11.1)           |       |
| ER positive        | 14(63.6)           | 40(66.7)           |       | 46(63)              | 8(88.9)           |       |
| PR Status          |                    |                    | 0.657 |                     |                   | 0.514 |
| PR negative        | 20(90.9)           | 56(93.3)           |       | 68(93.2)            | 8(88.9)           |       |
| PR positive        | 2(9.1)             | 4(6.7)             |       | 5(6.8)              | 1(11.1)           |       |
| Her2 Status        |                    |                    | 0.081 |                     |                   | 0.054 |
| Her-2 negative     | 13(59.1)           | 47(78.3)           |       | 56(76.7)            | 4(44.4)           |       |
| Her-2 positive     | 9(40.9)            | 13(21.7)           |       | 17(23.3)            | 5(55.6)           |       |
| Molecular subtypes |                    |                    | 0.268 |                     |                   | 0.298 |
| Luminal A-like     | 2(9.1)             | 4(6.7)             |       | 5(6.8)              | 1(11.1)           |       |
| Luminal B-like     | 12(54.5)           | 36(60)             |       | 41(56.2)            | 7(77.8)           |       |
| Her-2 enriched     | 5(22.7)            | 5(8.3)             |       | 9(12.3)             | 1(11.1)           |       |
| Triple negative    | 3(13.6)            | 15(25)             |       | 18(24.7)            | 0(0)              |       |
| Ki67               |                    |                    | 0.583 |                     |                   | 1.000 |
| Ki67<30            | 8(36.4)            | 18(30)             |       | 23(31.5)            | 3(33.3)           |       |
| Ki67≥30            | 14(63.6)           | 42(70)             |       | 50(68.5)            | 6(66.7)           |       |

Abbreviations: T, tumor; N, nodal; ER estrogen receptor; PR, progesterone receptor; Her-2, human epidermal growth factor receptor 2; Data are given as n (%) HDAC1, histone deacetylases 1; xCT, glutamate-cysteine reverse transporter protein; GPX4, glutathione peroxidase 4; ABCB1, ATP binding cassette subfamily B member 1.
