# Supplementary material for: The effect of ferroptosis - related proteins and histone deacetylases1 on neoadjuvant chemotherapy in breast cancer
Source: PubMed Central journal article supplement — Medicine (Baltimore). 2023 Jul 28;102(30):e34444. doi: 10.1097/MD.0000000000034444 (PMC10378733; doi:10.1097/md.0000000000034444), 2023-07-28
Supplement: medi-102-e34444-s003.pdf [file medi-102-e34444-s003.pdf]

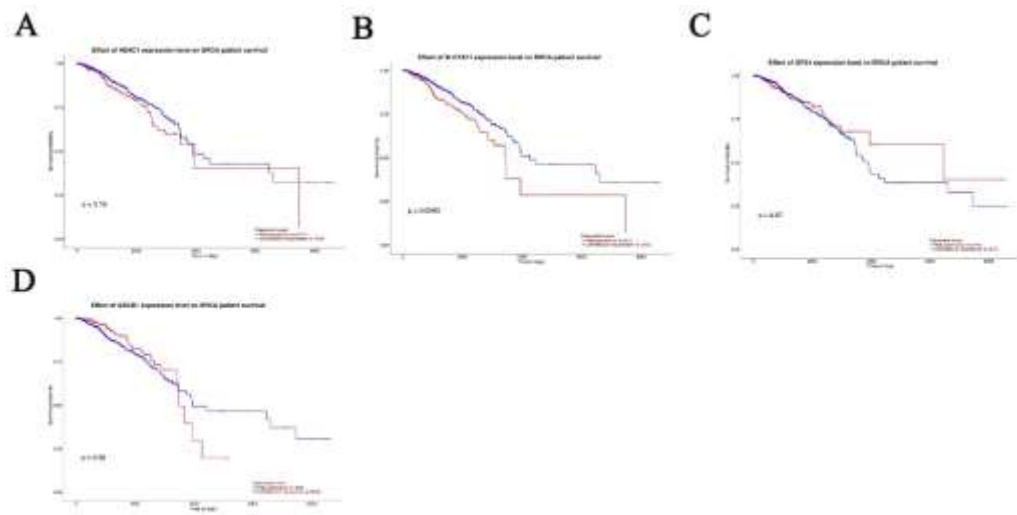

**Fig. S1 Overall Survival Curves.** Survival and Prognostic Prediction of Breast Cancer by histone deacetylases 1(HDAC1) (A), glutamate-cysteine reverse transporter protein (xCT, gene name SLC7A11) (B), glutathione peroxidase 4 (GPX4) (C), and ATP binding cassette subfamily B member 1 (ABCB1) (D).
