# Supplementary material for: The effect of ferroptosis - related proteins and histone deacetylases1 on neoadjuvant chemotherapy in breast cancer
Source: PubMed Central journal article supplement — Medicine (Baltimore). 2023 Jul 28;102(30):e34444. doi: 10.1097/MD.0000000000034444 (PMC10378733; doi:10.1097/md.0000000000034444), 2023-07-28
Supplement: medi-102-e34444-s004.pdf [file medi-102-e34444-s004.pdf]

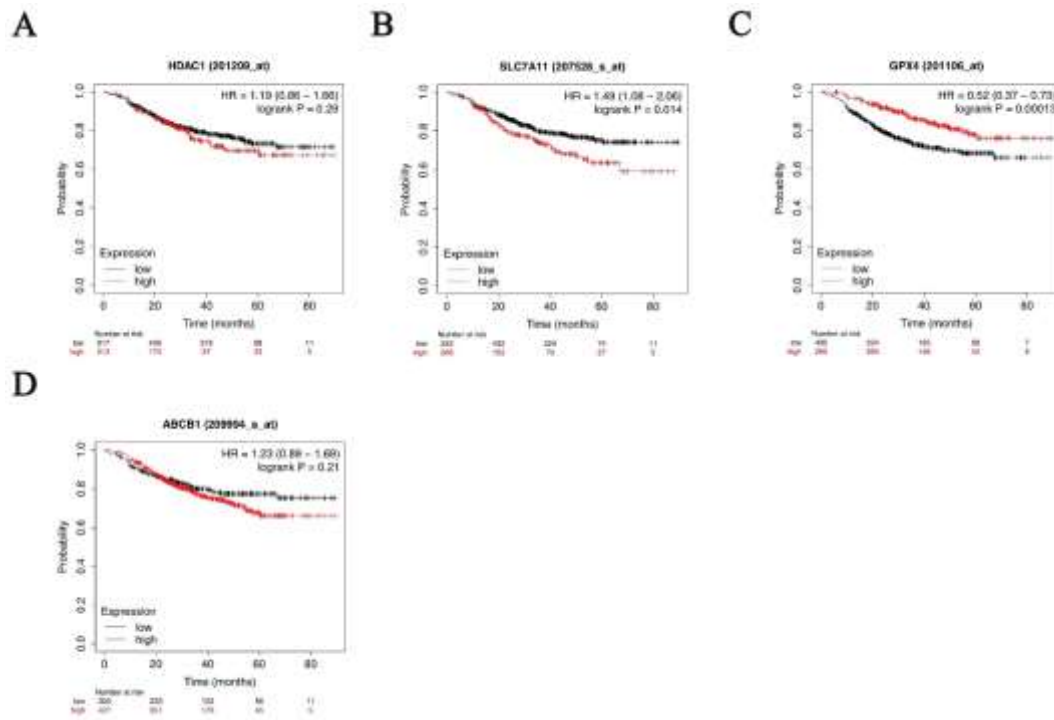

**Fig. S2 Cumulative disease-free survival curves.** Kaplan-Meier plots according to different histone deacetylases 1(HDAC1) (A), glutamate-cysteine reverse transporter protein (xCT, gene name SLC7A11) (B), glutathione peroxidase 4 (GPX4) (C), and ATP binding cassette subfamily B member 1 (ABCB1) (D).

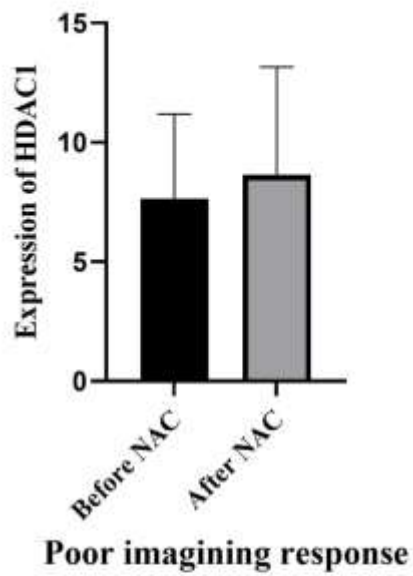

**A**

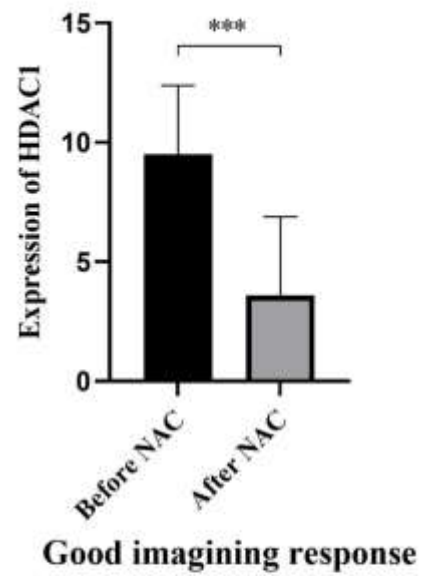

**B**

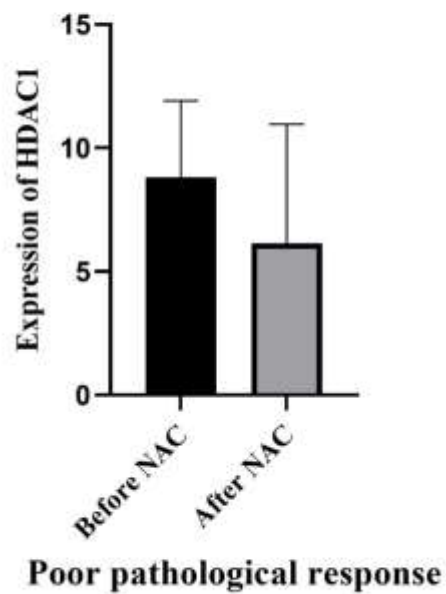

**C**

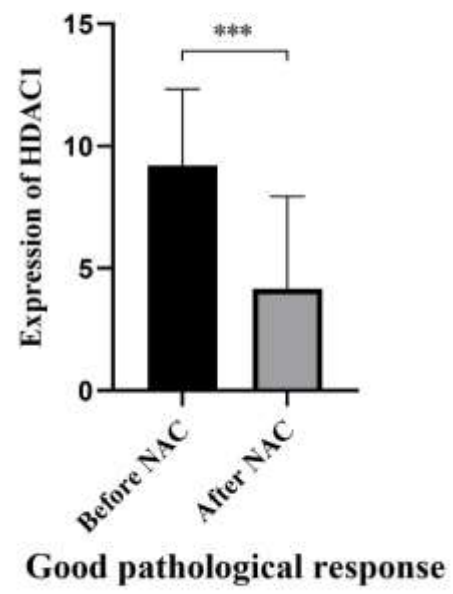

**D**

**Fig. S3 Expression Change of histone deacetylases 1 before and after neoadjuvant chemotherapy in different groups.** (A)poor imaging group;(B) good imaging group;(C) poor pathological group; (D) good pathological group.

Abbreviations: HDAC1, histone deacetylases 1; NAC, neoadjuvant chemotherapy.

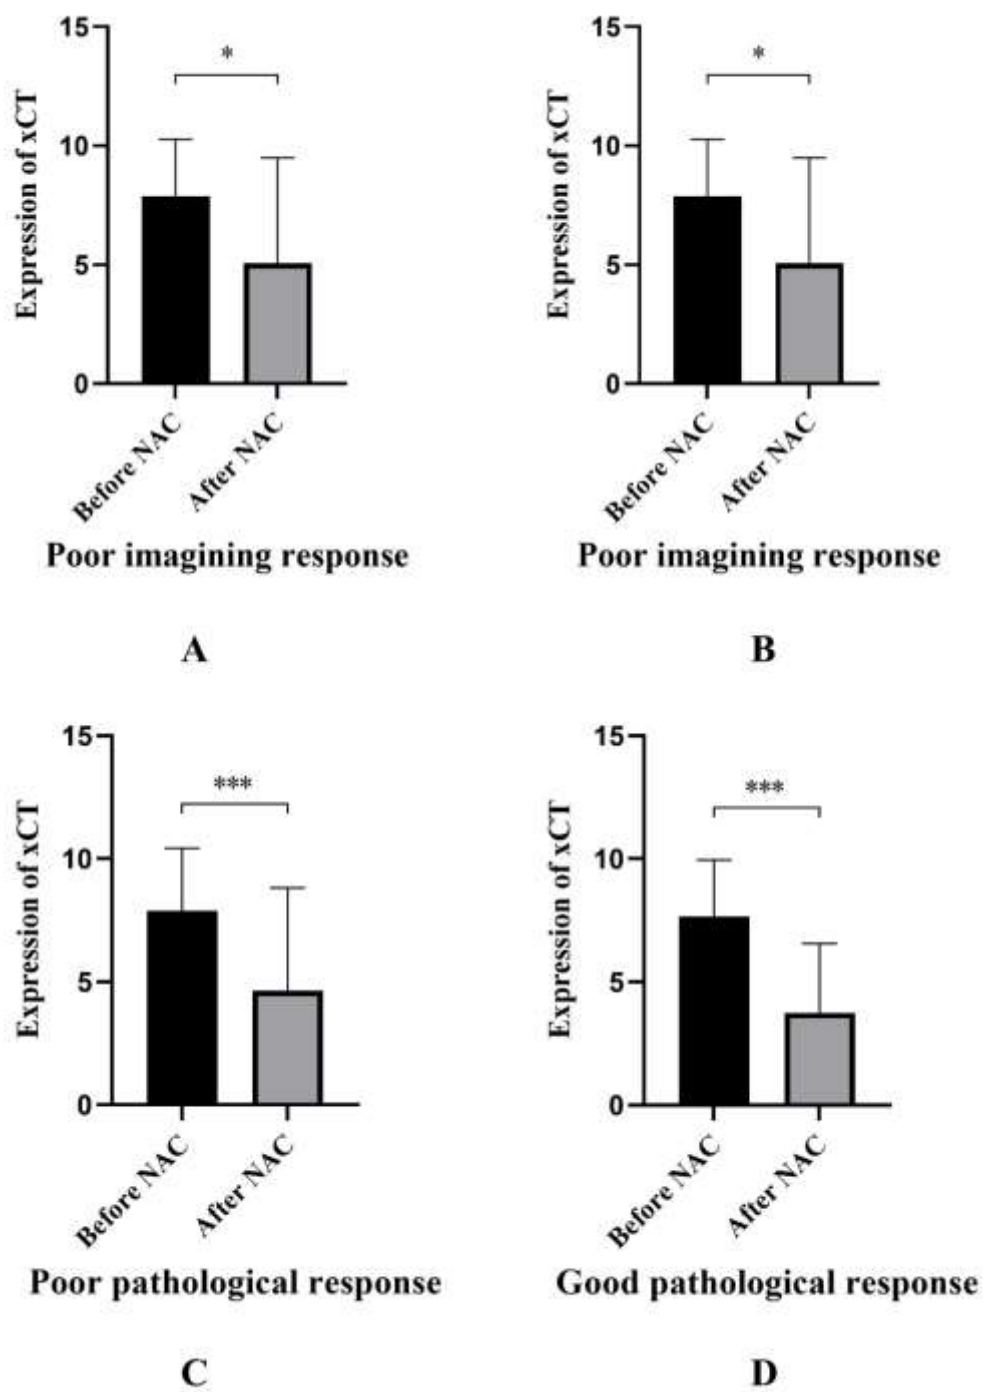

**Fig. S4 Expression Change of glutamate-cysteine reverse transporter protein before and after neoadjuvant chemotherapy in different groups. (A)poor imaging group;(B) good imaging group;(C) poor pathological group; (D) good pathological group.**

Abbreviations: xCT, glutamate-cysteine reverse transporter protein; NAC, neoadjuvant chemotherapy.

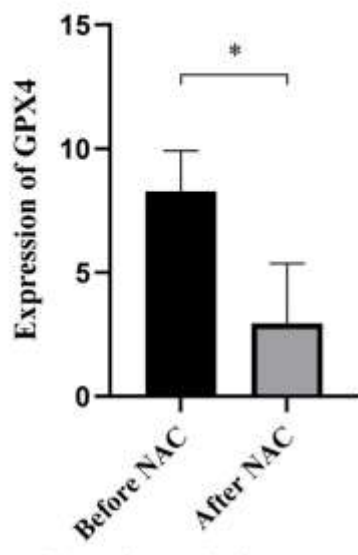

**Poor imaging response**

**A**

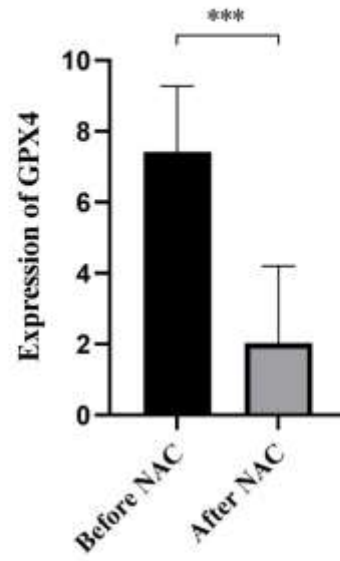

**Good imaging response**

**B**

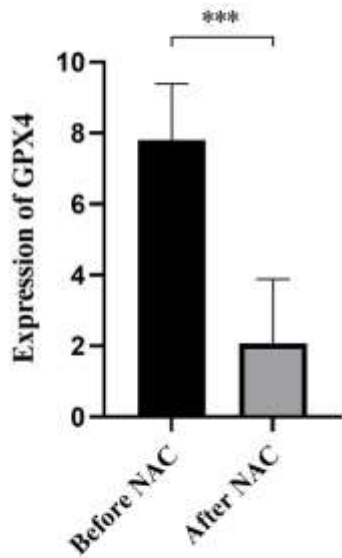

**Poor pathological response**

**C**

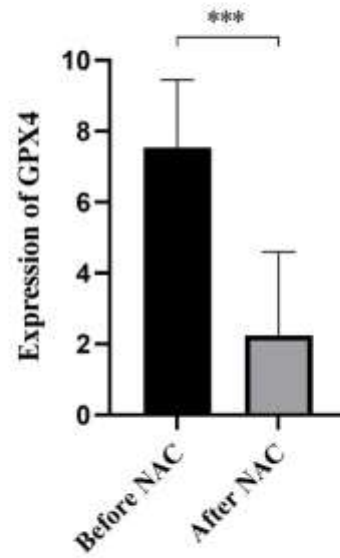

**Good pathological response**

**D**

**Fig. S5 Expression Change of glutathione peroxidase 4 (GPX4) before and after neoadjuvant chemotherapy in different groups. (A)poor imaging group;(B) good imaging group;(C) poor pathological group; (D) good pathological group.**

Abbreviations: GPX4, glutathione peroxidase 4; NAC, neoadjuvant chemotherapy.

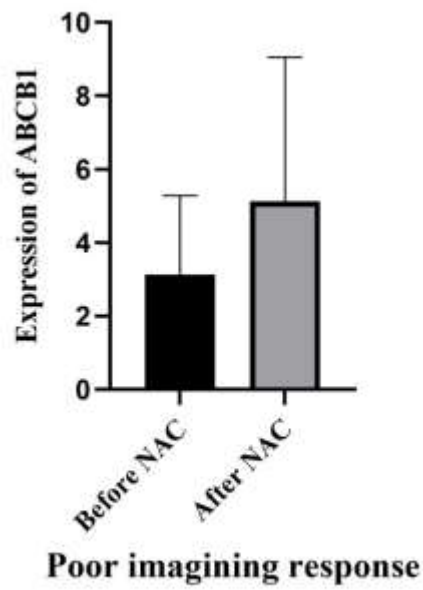

**A**

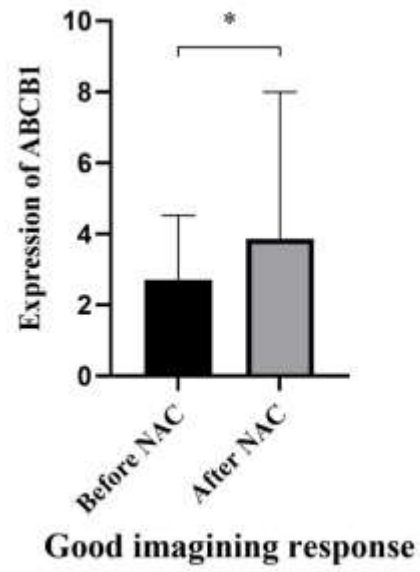

**B**

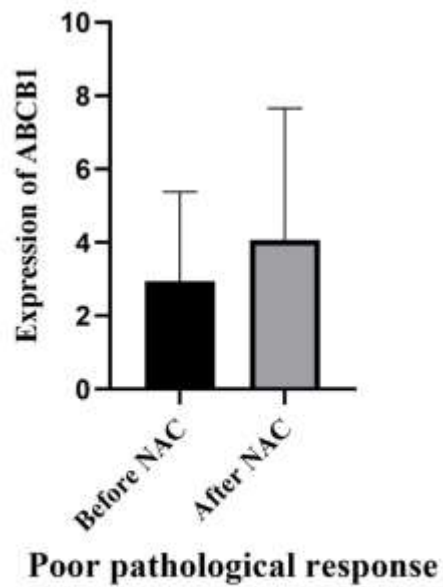

**C**

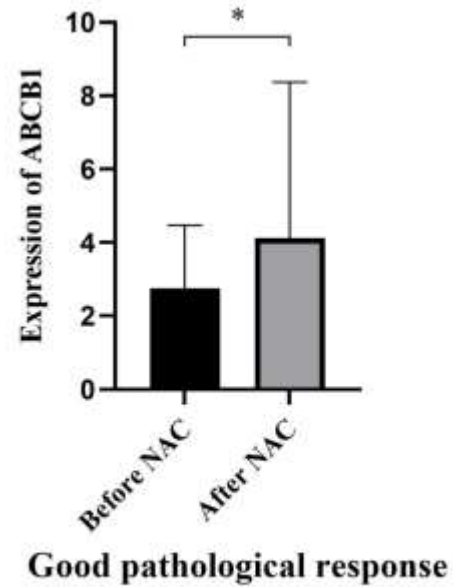

**D**

**Fig. S6 Expression Change of ATP binding cassette subfamily B member 1 (ABCB1) before and after neoadjuvant chemotherapy in different groups. (A)poor imaging group;(B) good imaging group;(C) poor pathological group; (D) good pathological group.**

Abbreviations: ABCB1, ATP binding cassette subfamily B member 1; NAC, neoadjuvant chemotherapy.
