# Supplementary material for: The effect of ferroptosis - related proteins and histone deacetylases1 on neoadjuvant chemotherapy in breast cancer
Source: PubMed Central journal article supplement — Medicine (Baltimore). 2023 Jul 28;102(30):e34444. doi: 10.1097/MD.0000000000034444 (PMC10378733; doi:10.1097/md.0000000000034444), 2023-07-28
Supplement: medi-102-e34444-s005.pdf [file medi-102-e34444-s005.pdf]

**Table S2 Difference between expression of ferroptosis-related protein and HDAC1 before NAC**

| Proteins               | Total<br>(n = 82) | Expression of HDAC1 |                      | p      |
|------------------------|-------------------|---------------------|----------------------|--------|
|                        |                   | Low<br>(n=42,51.2%) | High<br>(n=40,48.8%) |        |
| Expression of xCT      |                   |                     |                      | <0.001 |
| Low                    | 27(32.9)          | 23 (54.8)           | 4 (10)               |        |
| High                   | 55(67.1)          | 19 (45.2)           | 36 (90)              |        |
| Expression of<br>GPX4  |                   |                     |                      | 0.018  |
| Low                    | 22(26.8)          | 16 (38.1)           | 6 (15)               |        |
| High                   | 60(73.2)          | 26 (61.9)           | 34 (85)              |        |
| Expression of<br>ABCB1 |                   |                     |                      | 0.735  |
| Low                    | 73(89.0)          | 38 (90.5)           | 35 (87.5)            |        |
| High                   | 9(11.0)           | 4 (9.5)             | 5 (12.5)             |        |

Abbreviations: HDAC1, histone deacetylases 1; xCT, glutamate-cysteine reverse transporter protein; GPX4, glutathione peroxidase 4; ABCB1, ATP binding cassette subfamily B member 1.
