# Supplementary material for: The effect of ferroptosis - related proteins and histone deacetylases1 on neoadjuvant chemotherapy in breast cancer
Source: PubMed Central journal article supplement — Medicine (Baltimore). 2023 Jul 28;102(30):e34444. doi: 10.1097/MD.0000000000034444 (PMC10378733; doi:10.1097/md.0000000000034444), 2023-07-28
Supplement: medi-102-e34444-s006.pdf [file medi-102-e34444-s006.pdf]

**Table S3 Correlations between expression change of ferroptosis-related protein and ABCB1 in pathological response group.**

| Protein                    | Expression Change of ABCB1 |       |                            |        |
|----------------------------|----------------------------|-------|----------------------------|--------|
|                            | Poor Pathological Response |       | Good Pathological Response |        |
|                            | r                          | p     | r                          | p      |
| Expression Change of xCT   | -0.549                     | 0.022 | 0.380                      | 0.002  |
| Expression Change of GPX4  | -0.091                     | 0.728 | 0.438                      | <0.001 |
| Expression Change of HDAC1 | 0.692                      | 0.002 | 0.433                      | <0.001 |

Abbreviations: HDAC1, histone deacetylases 1; xCT, glutamate-cysteine reverse transporter protein; GPX4, glutathione peroxidase 4; ABCB1, ATP binding cassette subfamily B member 1.

**Table S4 Correlations between expression change of ferroptosis-related protein and ATP binding cassette subfamily B member 1(ABCB1) in imaging response group.**

| Protein                    | Expression Change of ABCB1 |       |                       |        |
|----------------------------|----------------------------|-------|-----------------------|--------|
|                            | Poor Imaging Response      |       | Good Imaging Response |        |
|                            | r                          | p     | r                     | p      |
| Expression Change of xCT   | -0.459                     | 0.074 | 0.391                 | 0.001  |
| Expression Change of GPX4  | 0.089                      | 0.744 | 0.404                 | 0.001  |
| Expression Change of HDAC1 | 0.591                      | 0.016 | 0.428                 | <0.001 |

Abbreviations: HDAC1, histone deacetylases 1; xCT, glutamate-cysteine reverse transporter protein; GPX4, glutathione peroxidase 4; ABCB1, ATP binding cassette subfamily B member 1.
